# Supplementary material for: Synthesis and characterization of boron carbon oxynitride films with tunable composition using methane, boric acid and ammonia
Source: Royal Society of Chemistry journal article supplement (doi:10.1039/c7nj01886j), 2017-01-01
Supplement: c7nj01886j1.pdf [file c7nj01886j1.pdf]

## Supplementary Information

### Synthesis and Characterization of boron carbon oxynitride films with tunable composition using methane, boric acid and ammonia

Boitumelo J Matsoso<sup>a,b</sup>, Kamalakannan Ranganathan<sup>a,b</sup>, Bridget K Mutuma<sup>a,b</sup>, Tsenolo Leroholi<sup>b</sup>,  
Glenn Jones<sup>c,d</sup> and Neil J Coville<sup>a,b\*</sup>

<sup>a</sup>DST-NRF Centre of Excellence in Strong Materials and <sup>b</sup>Molecular Sciences Institute, School of Chemistry, University of the Witwatersrand, 2050, Johannesburg, South Africa

<sup>c</sup>Department of Chemistry, University College London, Gordon Street, London, UK

<sup>d</sup>Johnson Matthey Technology Center, Blount's Court, Sonning Common, Reading, RG4 9NH, UK.

#### *Synthesis and transfer of BCNO films*

Large area BCNO films were grown on a Cu substrate using an atmospheric pressure chemical vapour deposition method with CH<sub>4</sub>, H<sub>2</sub>, NH<sub>3</sub> (10% in Ar), and H<sub>3</sub>BO<sub>3</sub> as precursor materials. Initially, the Cu foil was electrochemically cleaned for 90 sec in an aqueous mixture of 150 mL H<sub>3</sub>PO<sub>3</sub>, 150 mL ethanol, 30 mL iso-propanol and 3.0 g urea using a 12 V current<sup>35</sup>. The Cu foil was placed at the center of a 20 cm × 100 cm quartz tube, and a quartz boat containing 100 mg of H<sub>3</sub>BO<sub>3</sub> was at placed different distances (2, 4, 6, 8, 10, and 12 cm) from the Cu substrate. H<sub>3</sub>BO<sub>3</sub> placed at these distances allowed the vaporization temperature of H<sub>3</sub>BO<sub>3</sub> to be varied from ~ 300°C to ~ 1000 °C. The quartz tube was then inserted in a horizontal CVD furnace (Fig. S1), after which the furnace was heated to 1000 °C under H<sub>2</sub> and Ar atmospheres at the heating rate of 10 °C/min. After annealing for 30 min, growth of the BCNO films was achieved for 10 min by introducing 20 sccm CH<sub>4</sub> and 5 sccm NH<sub>3</sub> into the reaction chamber. For characterization purposes, the films were transferred onto a 300 nm SiO<sub>2</sub>/Si substrate, TEM Cu grids, and fused silica substrates using the PMMA (4.6 % m/v in chlorobenzene) - assisted electrochemical delamination method<sup>36</sup>. The films were named according to the distance of the boric acid from the growth substrate in the reaction chamber, e.g. BCNO-2 stands for the BCNO films grown using boric acid placed at 2 cm distance from the Cu foil.

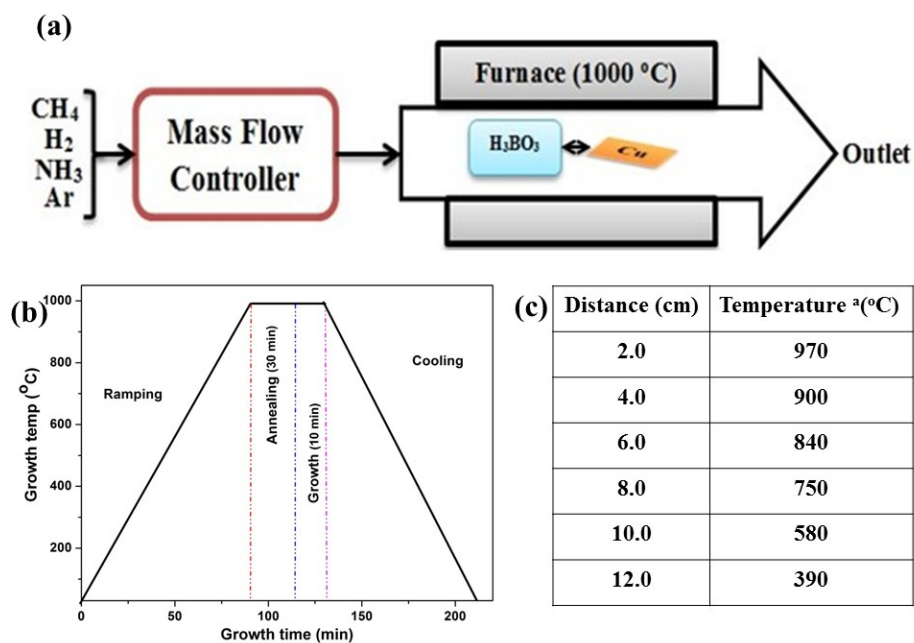

**Figure S1:** (a) CVD setup, (b) growth profile and (c) temperature profile for the growth of the BCNO films.

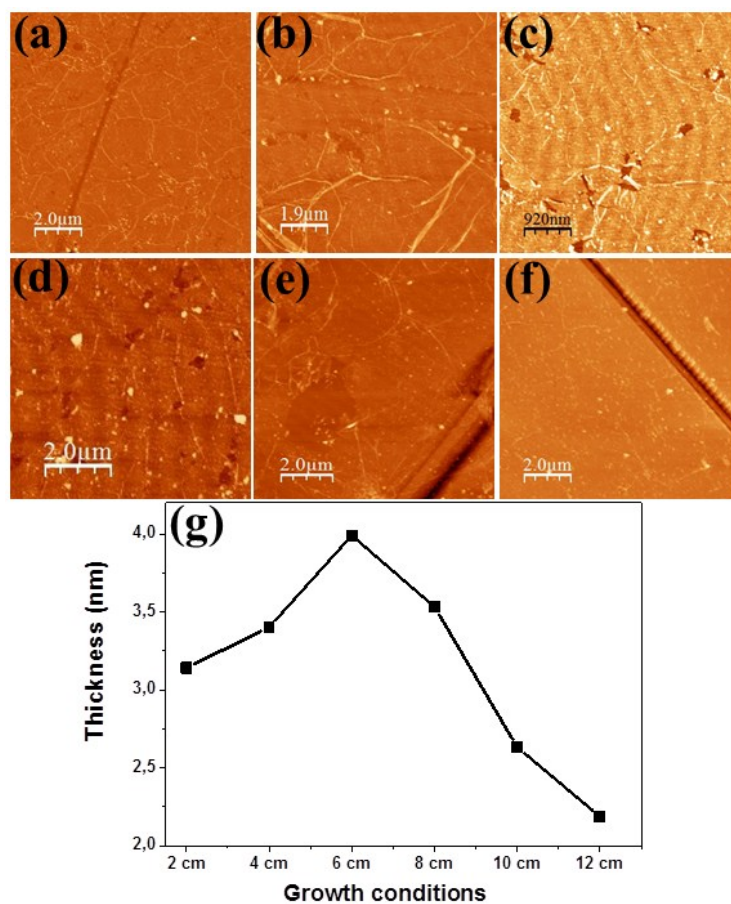

**Figure S2:** AFM topographic images (a – f) and estimated thickness plot (g) of BCNO films grown at 2 cm – 12 cm, respectively.

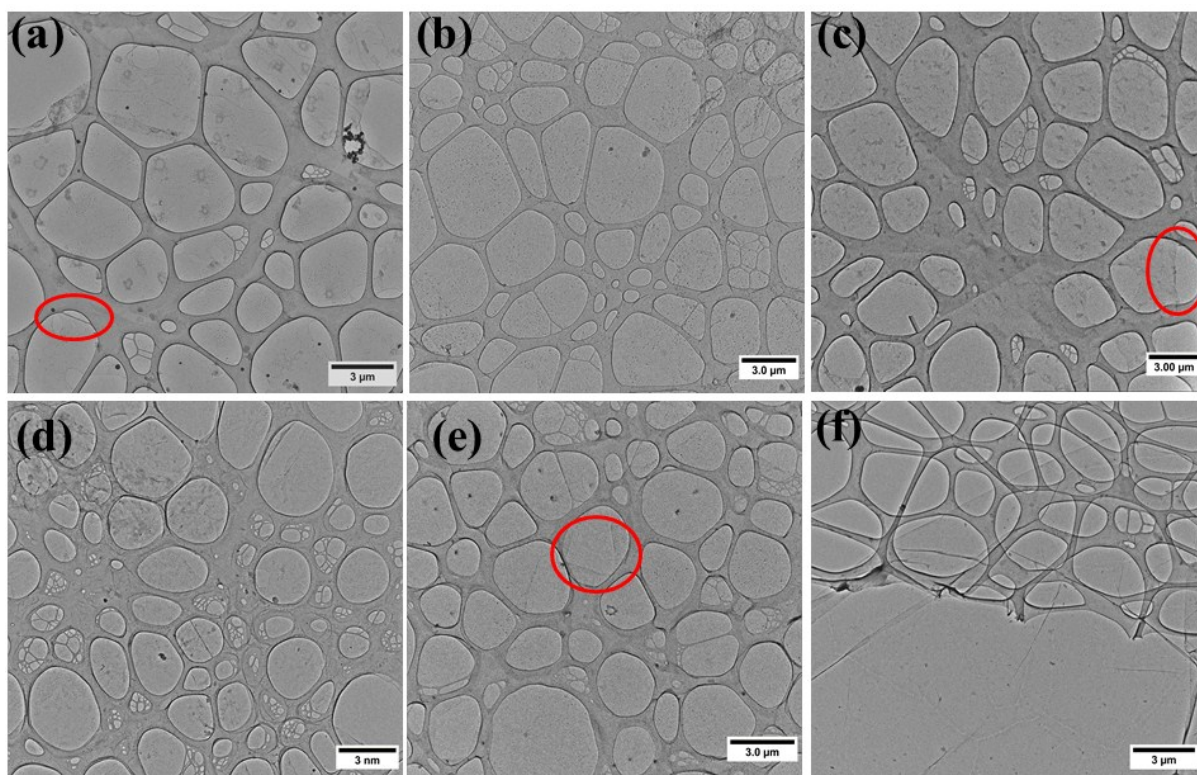

**Figure S3:** Low magnification TEM images of BCNO hybrid films grown at (a) 2 cm, (b) 4 cm, (c) 6 cm, (d) 8 cm, (e) 10 cm, and (f) 12 cm, respectively. Inset shows the TEM images of the respective BCNO films.

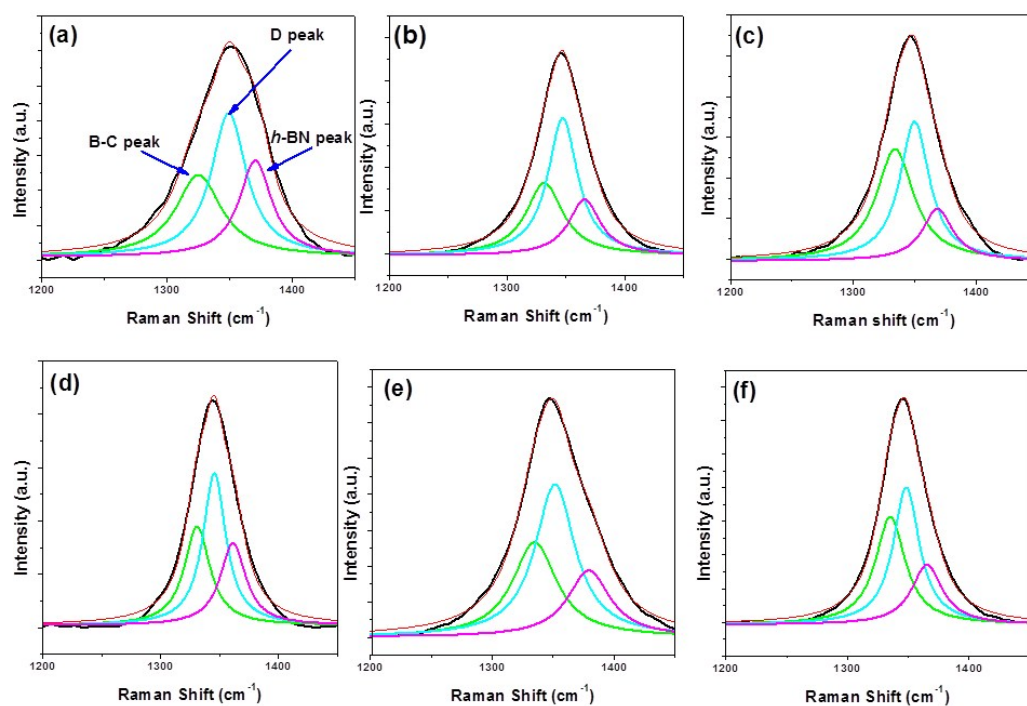

**Figure S4:** Deconvolution of defect induced D-bands for BCNO films grown at 2 cm -12 cm (a - f) showing the B-C, D, and the *h*-BN peaks, respectively.

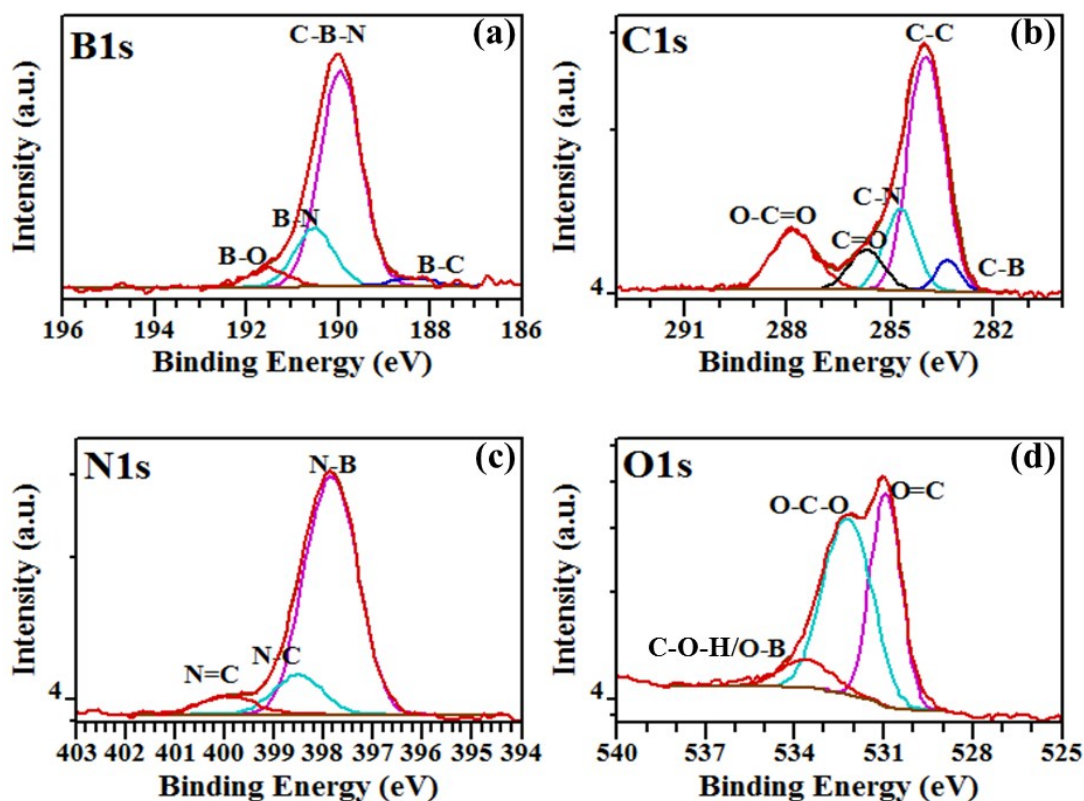

**Figure S5:** XPS spectra showing deconvoluted curves of (a) B1s, (b) C1s, (c) N1s, and O1s (d) of BN-doped graphene-BCN hybrid films grown at 4 cm using 100 mg  $\text{H}_3\text{BO}_3$  and 20 sccm  $\text{CH}_4$ .

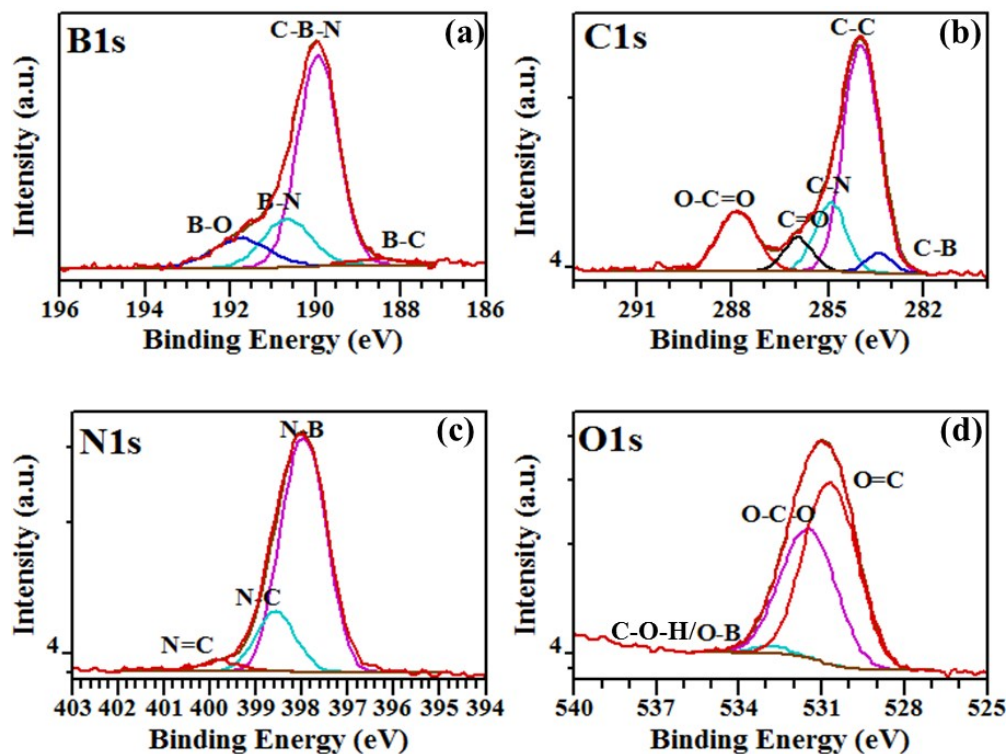

**Figure S6:** XPS spectra showing deconvoluted curves of (a) B1s, (b) C1s, (c) N1s, and O1s (d) of BN-doped graphene-BCN hybrid films grown at 6 cm using 100 mg H<sub>3</sub>BO<sub>3</sub> and 20 sccm CH<sub>4</sub>.

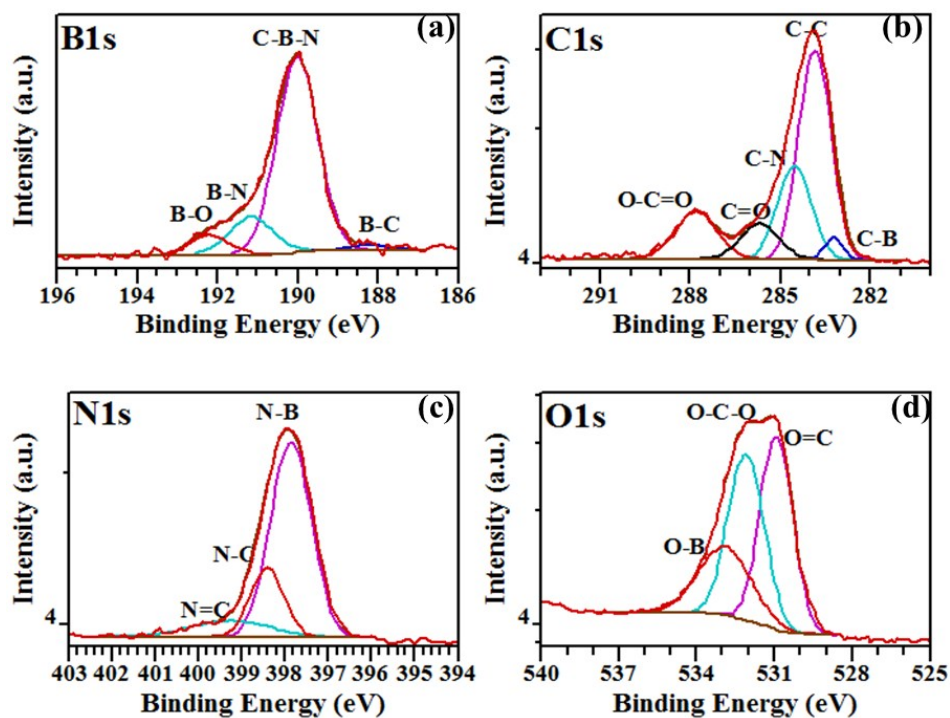

**Figure S7:** XPS spectra showing deconvoluted curves of (a) B1s, (b) C1s, (c) N1s, and O1s (d) of BN-doped graphene-BCN hybrid films grown at 8 cm using 100 mg H<sub>3</sub>BO<sub>3</sub> and 20 sccm CH<sub>4</sub>.

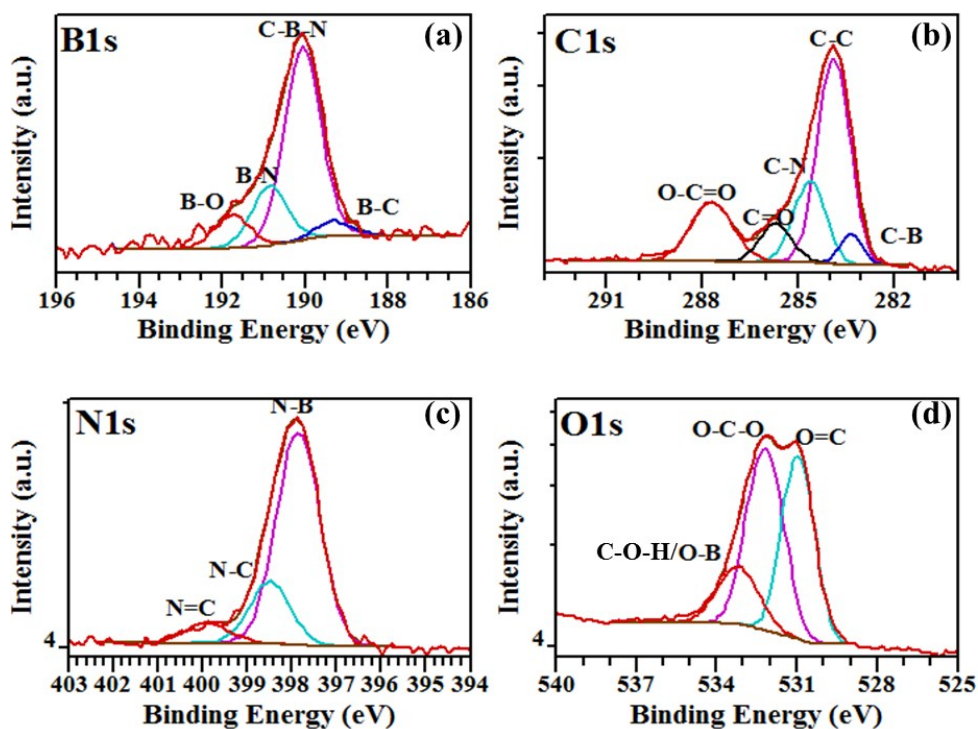

**Figure S8:** XPS spectra showing deconvoluted curves of (a) B1s, (b) C1s, (c) N1s, and O1s (d) of BN-doped graphene-BCN hybrid films grown at 10 cm using 100 mg H<sub>3</sub>BO<sub>3</sub> and 20 sccm CH<sub>4</sub>.

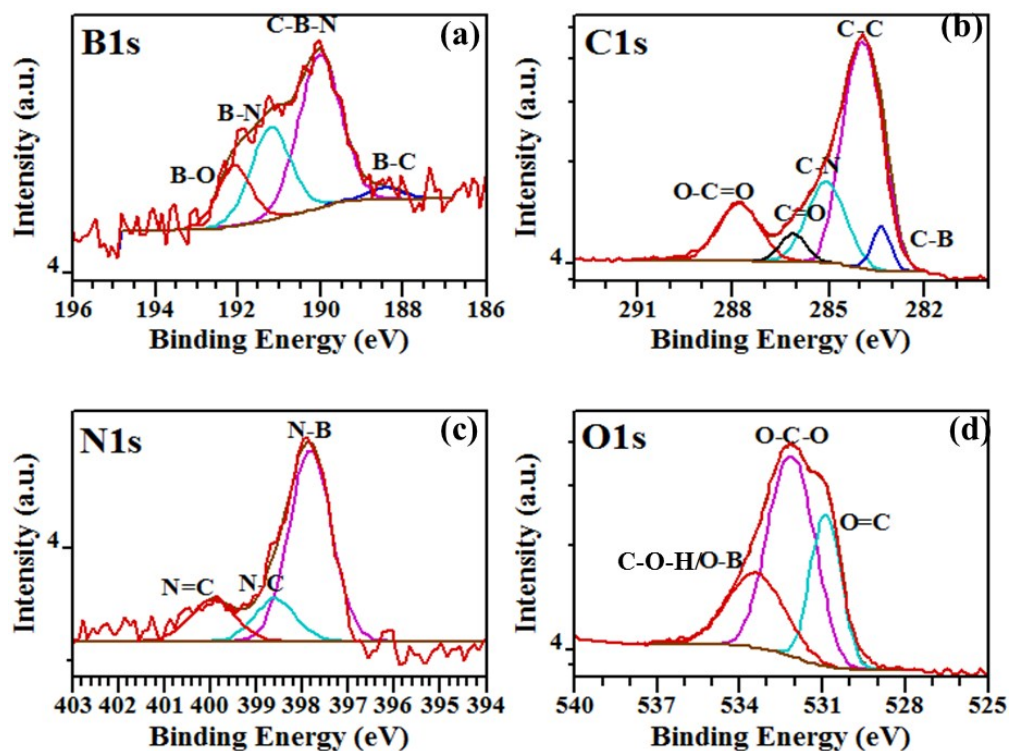

**Figure S9:** XPS spectra showing deconvoluted curves of (a) B1s, (b) C1s, (c) N1s, and O1s (d) of BN-doped graphene-BCN hybrid films grown at 12 cm using 100 mg H<sub>3</sub>BO<sub>3</sub> and 20 sccm CH<sub>4</sub>.

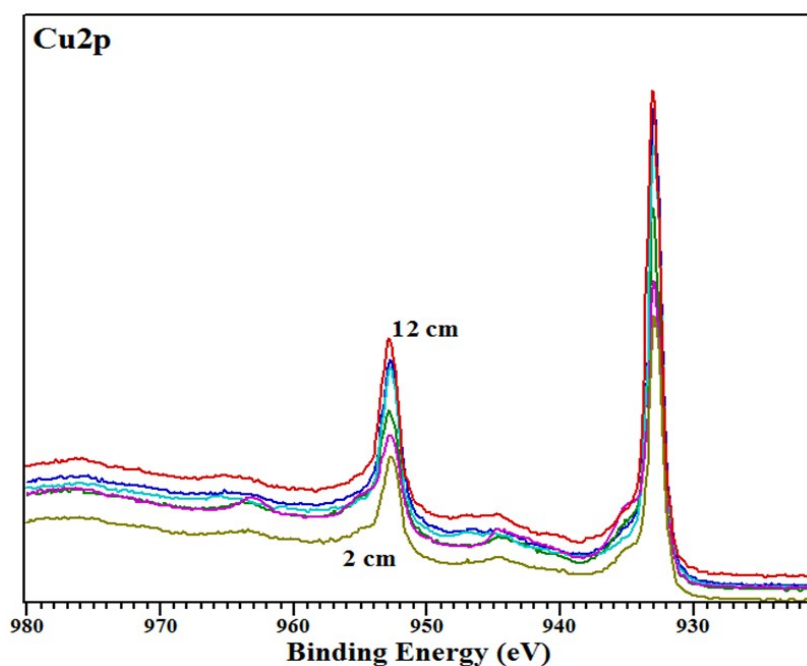

**Figure S10:** XPS spectra showing Cu2p of BCNO films grown at 2cm to 12 cm.

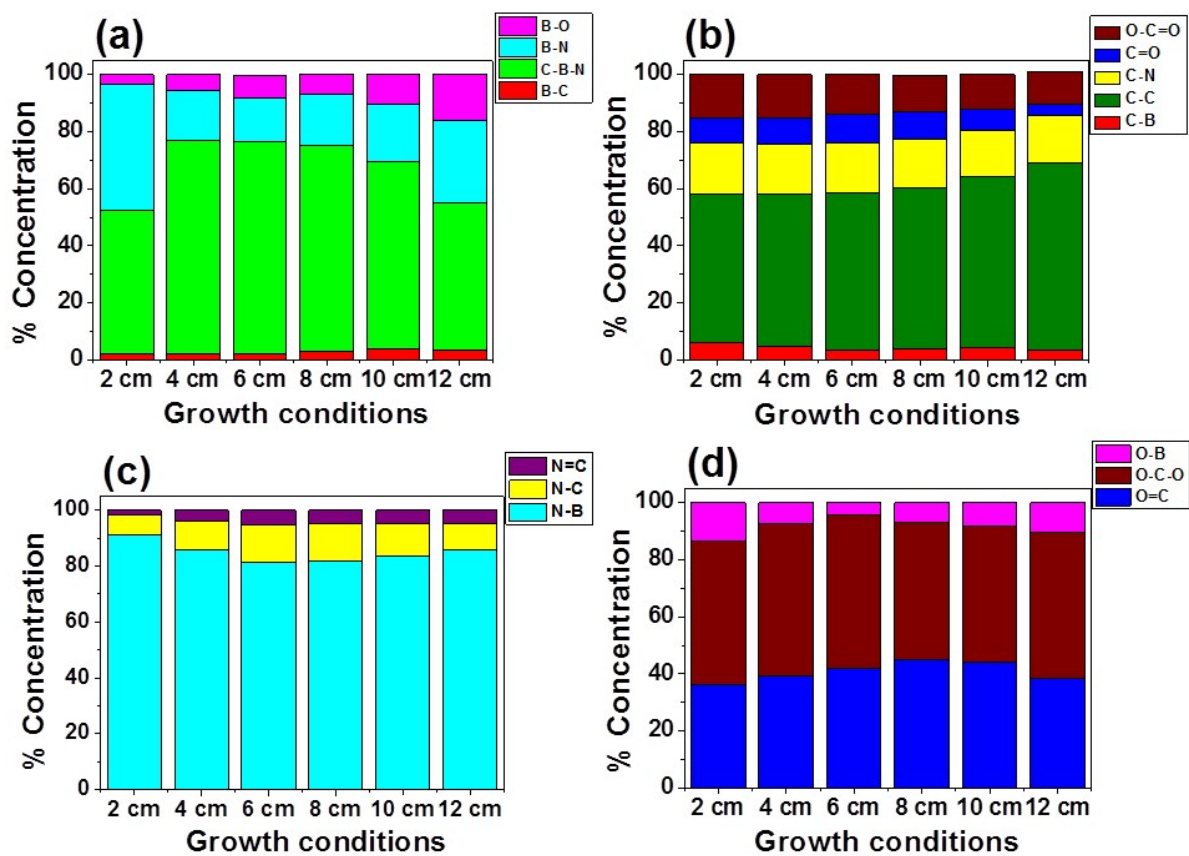

**Figure S11:** Evolution of bond concentration with increasing growth distance from the hot zone: a-d representing % concentrations of B, C, N and O atoms in (a) B1s, (b) C1s, (c) N1s and (d) O1s, respectively.

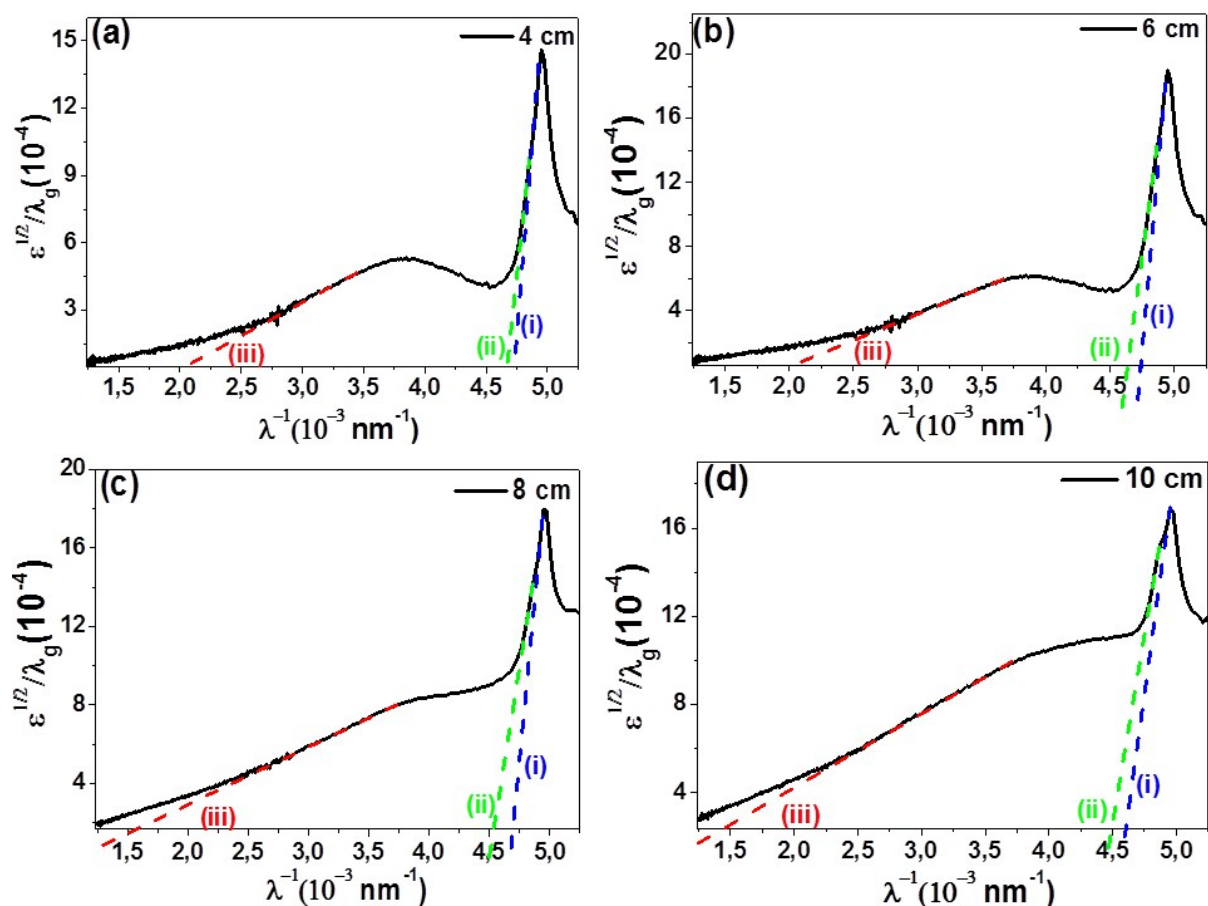

**Figure S12:** Tauc's plots of BCNO films grown at (a) 4 cm, (b) 6 cm, (c) 8 cm, and (d) 10 cm growth distances from the hot zone.

**Table S1:** Elemental ratio of all constituent atoms in the BCNO films

| Growth distance | Elemental ratio (at. %) |       |        |        |       |
|-----------------|-------------------------|-------|--------|--------|-------|
|                 | B/N                     | B/C   | N/C    | B/O    | O/C   |
| 2 cm            | 1,79                    | 0,281 | 0,164  | 0,298  | 0,663 |
| 4 cm            | 1,01                    | 0,408 | 0,0102 | 0,699  | 0,563 |
| 6 cm            | 1,40                    | 0,695 | 0,495  | 1,083  | 0,642 |
| 8 cm            | 1,28                    | 0,336 | 0,262  | 0,727  | 0,462 |
| 10 cm           | 1,12                    | 0,138 | 0,124  | 0,288  | 0,498 |
| 12 cm           | 1,41                    | 0,032 | 0,0225 | 0,0826 | 0,373 |
